# Supplementary material for: RNA-binding protein HuR reprograms immune T cells and promotes oral squamous cell carcinoma
Source: PubMed Central journal article supplement — Oral Oncol Rep. Author manuscript; Available in PMC 2024 Jun 1. (PMC11044901; doi:10.1016/j.oor.2024.100296), 2024-03-21
Supplement: NIHMS1984739-supplement-Supplemental_Figure_Legends.pdf [file NIHMS1984739-supplement-Supplemental_Figure_Legends.pdf]

## **Supplemental Figure Legends**

**Figure S1. HuR KO oral mucosal tissues.** H&E and immunohistology analysis of HuR in oral mucosal tissues obtained from WT and HuR KO mice. The scale bar denotes 100um.

**Figure S2. High expression of HuR in oral squamous cell carcinoma.** WT and HuR KO mice were treated with 4NQO, and tumors were collected and stained for H&E, HuR, and proliferation marker ki67. Increased expression of HuR observed in SCC tumors.
