# Supplementary figures and images for: RNA-binding protein HuR reprograms immune T cells and promotes oral squamous cell carcinoma
Source: PubMed Central journal article supplement — Oral Oncol Rep. Author manuscript; Available in PMC 2024 Jun 1. (PMC11044901; doi:10.1016/j.oor.2024.100296), 2024-03-21

Figure S2

WT

HuR-k14Cre<sup>-/-</sup>

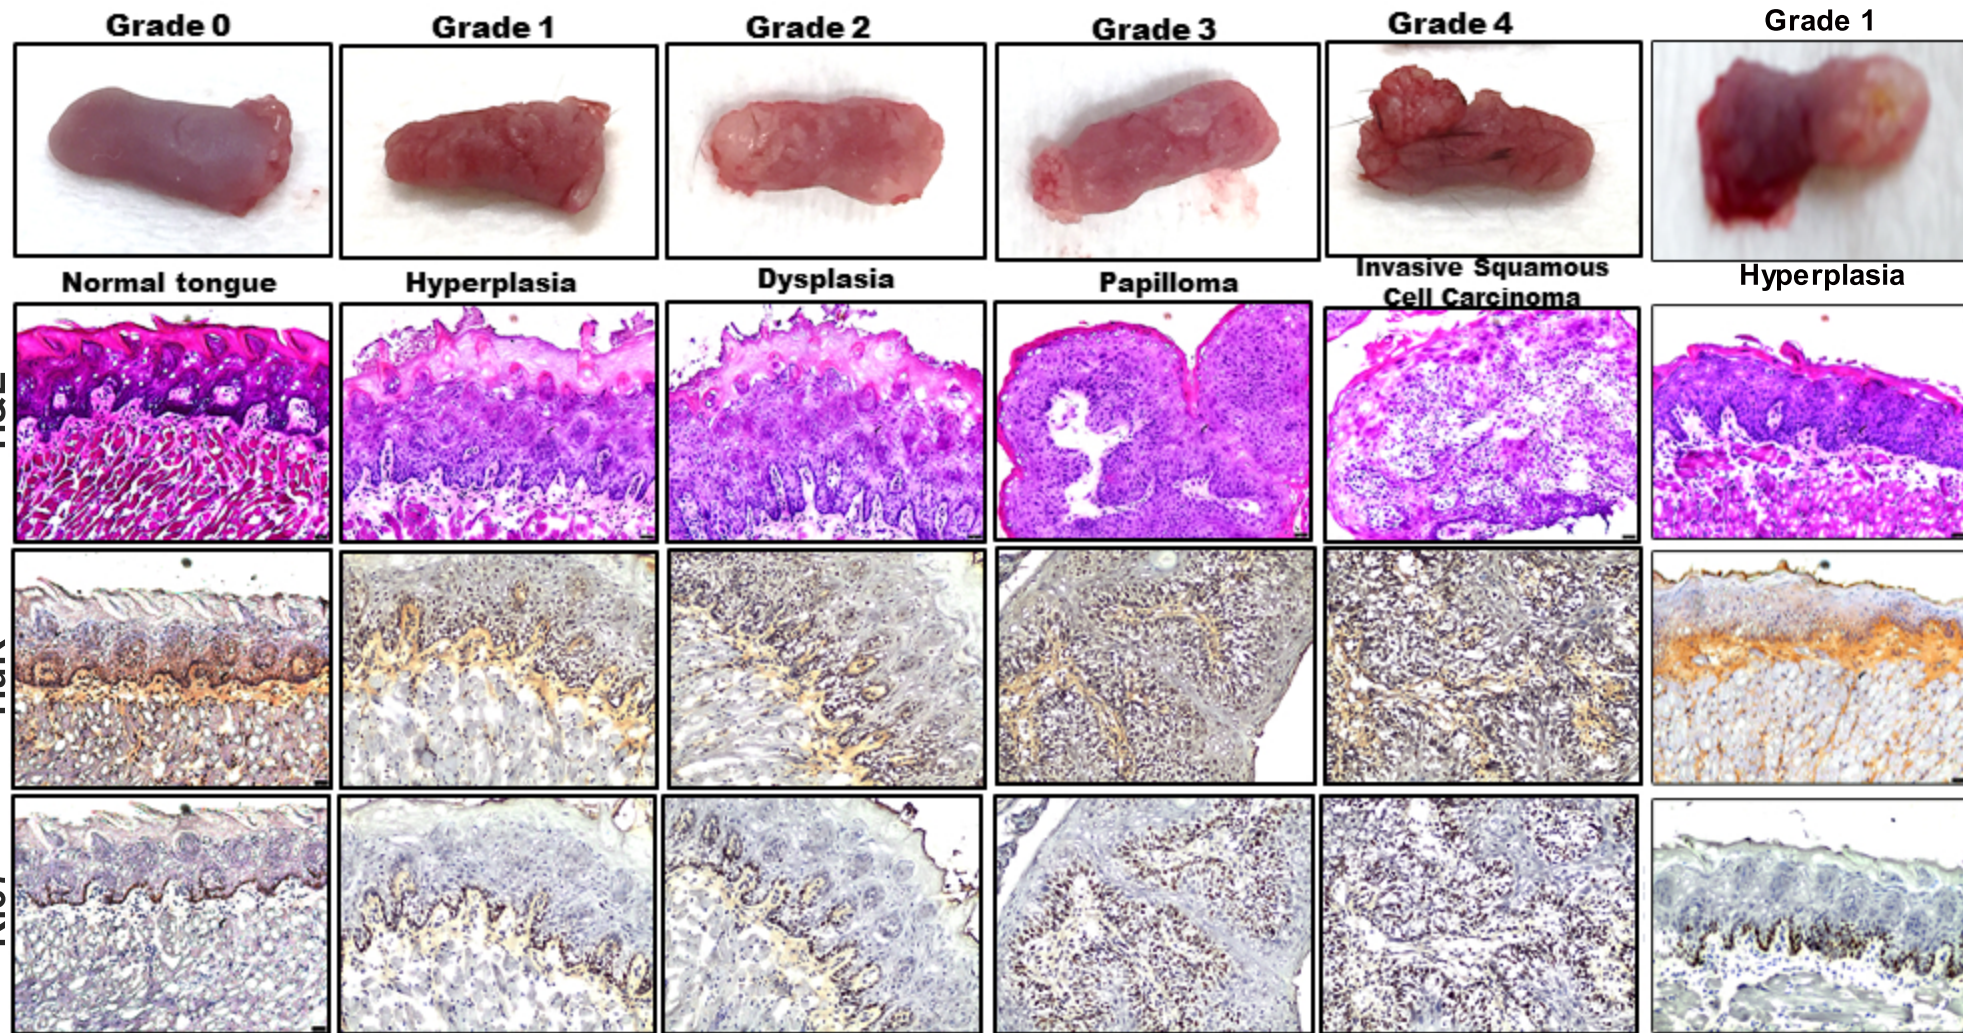

Supplement: NIHMS1984739-supplement-Sup-Figure-2.pdf [file NIHMS1984739-supplement-Sup-Figure-2.pdf]

H&E —

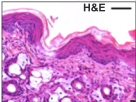

Anti-HuR

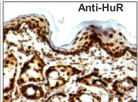

WT

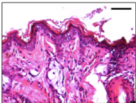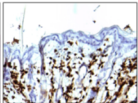

HuR<sup>-/-</sup>

Supplement: NIHMS1984739-supplement-Sup__Figure-1.pdf [file NIHMS1984739-supplement-Sup__Figure-1.pdf]
